# Clustering of patient comorbidities within electronic medical records enables high-precision COVID-19 mortality prediction

Erwann Le Lannou [1], Benjamin Post MD [2, 3], Shlomi Haar [1, 4, 6], Stephen J. Brett MD [5], Balasundaram Kadirvelu [1,2] & A. Aldo Faisal [1, 2, 3, 6]

- 1: Brain & Behaviour Lab: Department of Bioengineering, Imperial College London, London, UK
- 2: Brain & Behaviour Lab: Department of Computing, Imperial College London, London, UK
- 3: UKRI Centre for Doctoral Training in AI for Healthcare, Imperial College London, London, UK
- 4: Department of Brain Sciences, Imperial College London, London, UK
- 5: Department of Surgery and Cancer, Imperial College, London, UK
- 6: Behaviour Analytics Lab, Data Science Institute, London, UK

## Acknowledgements

We are grateful to UK Biobank participants. This research has been conducted using the UK Biobank Resource under Application Number 21770. Infrastructure support for this research was provided by the Imperial NIHR Biomedical Research Centre. AAF acknowledges his UKRI Turing AI Fellowship (EP/V025449/1). The acknowledged parties and funders had no role in the design of the study.

## Author Contributions

Conception and design: ELL, SH, AAF; data analysis: ELL, SH, BK, AAF; data interpretation: ELL, BP, SH, SJB, AAF; writing and revising the paper: ELL, BP, SH, SJB, BK, AAF

**Conflict of Interest:** The authors have declared that no competing interests exist.

**Corresponding author:** [aldo.faisal@imperial.ac.uk](mailto:aldo.faisal@imperial.ac.uk) (AAF)

## Abstract:

We present an explainable AI framework to predict mortality after a positive COVID-19 diagnosis based solely on data routinely collected in electronic healthcare records (EHRs) obtained prior to diagnosis. We grounded our analysis on the ½ Million people UK Biobank and linked NHS COVID-19 records. We developed a method to capture the complexities and large variety of clinical codes present in EHRs, and we show that these have a larger impact on risk than all other patient data but age. We use a form of clustering for natural language processing of the clinical codes, specifically

NOTE: This preprint reports new research that has not been certified by peer review and should not be used to guide clinical practice.

topic modelling by Latent Dirichlet Allocation (LDA), to generate a succinct digital fingerprint of a patient's full secondary care clinical history, i.e. their comorbidities and past interventions. These digital comorbidity fingerprints offer immediately interpretable clinical descriptions that are meaningful, e.g. grouping cardiovascular disorders with common risk factors but also novel groupings that are not obvious. The comorbidity fingerprints differ in both their breadth and depth from existing observational disease associations in the COVID-19 literature. Taking this data-driven approach allows us to avoid human-induction bias and confirmation bias during selection of what are important potential predictors of COVID-19 mortality. Together with age, these digital fingerprints are the single most important factor in our predictor. This holds the potential for improving individual risk profiling for clinical decisions and the identification of groups for public health interventions such as vaccine programmes. Combining our digital precondition fingerprints with demographic characteristics allow us to match or exceed the performance of existing state-of-the-art COVID-19 mortality predictors (EHCF) which have been developed through expert consensus. Our precondition fingerprinting and entire mortality prediction analytics pipeline are designed so as to be rapidly redeployable, e.g. for COVID-19 variants or other pre-existing diseases.

## Introduction

The outbreak of the novel, severe and acute respiratory syndrome, Coronavirus 2 (SARS-CoV-2), and its associated disease COVID-19, in Wuhan China, has presented an important and urgent threat to global health since December 2019. Declared a pandemic by the World Health Organisation (WHO) in early March<sup>1</sup>, this disease has, as of 8 March 2021, caused 2,582,528 deaths from 116,166,652 cumulative worldwide cases<sup>2</sup>. On the same day in the United Kingdom (UK) SARS-CoV-2 is reported as responsible for 124,419 deaths<sup>2</sup>. The COVID-19 outbreak has led to an increase in hospital admissions and has considerably increased the demand for both general hospital and critical care beds<sup>3,4</sup>. This increases the need for an objective, data-driven understanding of risk factors and accurate prediction of adverse outcomes based on pre-existing information. Such understanding may facilitate better individual clinical decisions, but potentially also increase the resilience of public health policy.

Emerging evidence throughout the pandemic has identified several risk factors associated with COVID-19 clinical severity<sup>5</sup> and fatality<sup>6,7</sup>. Most commonly reported risk factors are old age<sup>8-10</sup>, male gender<sup>11,12</sup> and pre-existing underlying medical conditions<sup>6</sup>. In particular, the Chinese Centre for Disease Control and Prevention identified cardiovascular disease, hypertension, diabetes, respiratory disease, and numerous malignancies to be risk factors for COVID-19 fatality<sup>12</sup>. In the United States, the most commonly initially reported comorbidities were hypertension, obesity and diabetes<sup>9</sup>. Finally, a UK-wide study aiming to characterise the clinical features of patients with severe COVID-19 highlighted chronic cardiac disease, diabetes, and chronic pulmonary disease to be associated with a higher risk of clinical severity<sup>13-15</sup>. Better knowledge of an individual's risk can help better prioritise risk groups in the global vaccination effort as well as tailor our efforts for both prevention (e.g. targeted isolation or social distancing) and for treatment of confirmed cases such as immediate hospitalisation for people at greater risk. Many attempts have been made to provide risk prediction

models for COVID-19. Already in April 2020, Wynants et al. reviewed 145 prediction models<sup>16</sup>. Of the 145 described models, 23 models were aimed at estimating the risk of mortality. The review further identified that most studies had been performed on inpatients and required lab-testing (lymphocyte count, C-reactive protein, creatinine) and so were not aimed at community-based identification. In addition, the review concluded that the currently proposed models were ‘poorly reported, at high risk of bias, and their reported performance is probably optimistic’, with sample sizes rarely over 1000<sup>16</sup>. In order to define who is at high risk, governmental organisations have put forward defining criteria that aim to classify low- and high-risk groups of the population<sup>17,18</sup>. However, at present these criteria are developed by ‘expert consensus’ based on available bodies of evidence and so require time and effort and might be biased by the experts' priors. While the co-morbidities have been observed in affecting COVID-19 mortality<sup>19</sup> they have not been systematically analysed for building a principled integrated COVID-19 mortality risk predictor. Preconditions, especially if they appear grouped, so called multi-morbidities affect a substantial proportion of the world’s population<sup>20</sup>. Estimates of prevalence vary depending on population examined and definitions used, in the UK >50% of people have at least two conditions by age 65, and >50% have 3+ conditions by age 70<sup>21</sup>. Hence, we took a more principled approach to incorporating patient specific information by systematically including comorbidities and their co-occurrence in our data-driven analysis to avoid human-induction bias, while carefully avoiding and signposting the potential for AI bias further below<sup>22</sup>. Our approach is enabled by the existence of large population datasets with linkage to registries such as death records, hospital admission and COVID-19 testing results and therefore represent a novel opportunity for automated clinical risk prediction model development on larger cohorts. Here, we used the UK Biobank<sup>23,24</sup>, which since the 16 March 2020 has linked over 26,000 COVID-19 laboratory test results electronically to its 500,000 strong cohort of participants. The use of such linked datasets has an established track record for the development and evaluation of clinical risk models, including those for cardiovascular disease, cancer, and mortality<sup>25–28</sup>.

In this paper, we utilise the longitudinal medical records from the UK Biobank to predict COVID-19-related death. We demonstrate that the data already routinely collected and stored in EHRs can be rapidly leveraged to address pressing questions related to the COVID-19 pandemic. Notably, we apply a Topic Modelling approach, Latent Dirichlet Allocation (LDA), on the entirety of the UK Biobank population to construct precise ‘digital comorbidity fingerprints’ (DCFs) from EHR data. Using the early data from the UK COVID-19 epidemic, we explored the utility of our approach by using the DCFs to train a Random Forrest Classifier to predict COVID-19-related death. We demonstrate the face validity of such a two-step approach to model development by comparing the prediction performance of our DCFs, combined with previously documented demographic data, to a model based on expert consensus led feature selection, and one based entirely on age. We further consider the relationship between our data-driven DCFs and clinician-driven features. The approach proposed here is designed to provide a rapid, intuitive and accurate forecasting of COVID-19-related death based on past medical records, which is of special importance for managing hospital resources, vaccination efforts and preventative policies.

## Results

### *Characteristics of the study population*

A total of 2,499 COVID-19 patients were included in this analysis (Figure 1; cohort description in Table 1). Overall, the median (IQR) age of patients at baseline was 70.4 (59.9 - 76.3, range: 50.4 - 83.7) years, and 1,284 patients (51.4 %) were male. Over the study period, COVID-19-related deaths were recorded in linked death registration data for 349 patients (14.0 % of the study population). The hospitalised patients encompassed 79% of the 349 death events. Figure 1, shows the weekly number of positive test results during the study period, from January 30 to September 9, along with the weekly number of COVID-19 related deaths in the same period. We can observe a peak in early April 2020 (week of the 8 April, 272 people tested positive) followed by a peak in COVID-19 related deaths a

week later (week of the 15 April 2020, 61 COVID-19 related deaths). The median age of the patients who died of a COVID-19 related death was 76.0 years (76.1 years for men and 75.4 years for women). The median follow-up time for all patients (time between diagnosis and either death or end of the study) was 113 days (10 days for COVID-19-related deaths and 123 days for patients still alive at the end of the study period). Figure 1 shows the overall probability of survival 28 days after diagnosis was over 0.88, dropping to 0.82; whereas for participants over 80 years old, the survival probability was 0.69 after 28 days falling to 0.64.

In order to better characterise the impact of pre-existing conditions on the study population, we used the categories from our Expert Hand-Crafted Features (EHCF) (see Box 1). The most common comorbidity in the population was hypertension (47.4%) followed by Cardiovascular disease (39.0%) and cancer (21.1%) (Table 1). The univariate and fully adjusted associations (calculated using logistic regression) between patient level characteristics (Table 1) and odds of COVID-19-related death are shown in Table 1 and Figure 2. Increasing age showed the strongest association with an increased likelihood of COVID-19-related death; with participants aged over 80 years being over 15 times (fully adjusted OR: 15.86, 95% CI: 7.85 - 32.04) more likely to die of a COVID-19-related death compared to 50–59-year-olds. Other significant characteristics that showed an increased likelihood of COVID-19-related death are male gender (fully adjusted OR: 1.54, 95% CI: 1.18 - 2.01), and a previous diagnosis of hypertension (fully adjusted OR: 1.54 (1.14 - 2.09)). These findings are consistent with previously reported associations<sup>29–31</sup>.

### *Digital Comorbidity fingerprinting*

Pre-existing conditions are coded as thousands of possible ICD-10 disease codes in patient records. Our methodology adapts unsupervised methods from Natural Language Processing (NLP) trained on the general population (i.e. the entire UK Biobank which includes over half a million patients) in order to cluster patients' conditions using only disease codes from a patient's past hospital visits. We use a form of Latent Dirichlet Allocation, a Bayesian clustering method that can naturally model the

categorical nature and inherent imprecision of disease codes. This clustering distils thousands of disease codes, and billions of possible combinations into a set of DCFs. Each patient's pre-existing conditions are thus summarised by a single number (between 0-100%) describing how strong a specific pre-existing condition fingerprint is present in their record. All pre-existing conditions and their myriad of combinations are summarised by a total of 30 DCFs.

We describe hereafter how a second interpretable machine learning algorithm is used to classify participants with suspected or confirmed COVID-19 into a high and low COVID-19-related death risk category based on their digital precondition fingerprint and their demographics.

We initially fitted our DCF Model on the 402,902 participants who belonged to the UK Biobank cohort, were still alive in January 2020 and were part of the Hospital Episode Statistics (HES) sub-database. Latent Dirichlet Allocation was used to generate the topic distributions for all patients and ICD-10 code group. We tested multiple values of topics ( $k$  ranging from 2 to 100) and compared the resultant topic distribution with respect to the model coherence,  $C_v$ <sup>32</sup>. The best results were obtained for  $k = 30$  topics, and Dirichlet priors  $\alpha = 0.1$  and  $\eta = 0.6$ . We clinically reviewed disease codes grouped in each of the generated topics, i.e. the DCFs. We observe that our comorbidity fingerprinting does not group codes simply by clinical system (e.g. respiratory disorders or diseases of the circulatory system) as can be seen in Figure 3. Rather, the method groups past clinical codes in a more functional way (all precondition fingerprints are listed in the Supplementary Box 2). For example, *DCF 24* groups codes of cardiovascular disorders together (such as angina and myocardial infarction), but also includes some of the most common risk factors for these diseases, such as lipidaemia or family history of cardiac disorders. *DCF 7* groups codes for rhythm disorders (e.g. atrial fibrillation) with pulmonary embolisms. Precondition fingerprint *DCF 22* groups diabetic disorders with occurrences of renal failure and obesity. Other fingerprints, such as *DCF 5*, *DCF 8* and *DCF 19* are mainly defined by neoplasm and surgical procedures (e.g. acquired absence of organs).

These results indicate that comorbidity fingerprinting is able to yield clinically relevant topics by grouping diseases that often appear simultaneously. Some of the clusters are harder to interpret than others and would need to be further investigated. The DCFs are further described in Figure 4, where we demonstrate the ability of the DCFs to differentiate between patients that died of COVID-19 and the overall UK Biobank cohort. Figure 4 further outlines the DCFs ability to encompass notions of gender, age and BMI. It is, nonetheless, clear that comorbidity fingerprinting does generate coherent and interpretable results when applied to disease codes.

### *Prediction accuracy*

In order to evaluate our DCF approach to feature engineering, we used it as an input to a supervised classifier of COVID-19 mortality and assessed its discrimination capabilities when compared to a model built using the EHCF. The prediction accuracy for the two models under consideration are shown in Table 2 and Figure 5. We use a model built from age alone as a baseline for performance evaluation (area under the receiver operating curve (AUC-ROC): 0.709 95% CI: 0.692 - 0.727). Both the EHCF Model, (AUC-ROC: 0.734, 95% CI: 0.704 - 0.764) and the DCF Model, (AUC-ROC: 0.730, 95% CI: 0.700 - 0.760) achieved similar discrimination scores. A Wilcoxon's rank-sum test was performed to assess if our DCF Model showed better discrimination capabilities than the baseline. Although there was a small absolute difference between these two models (a difference of 0.021), the *p*-value was significant at 0.0409.

### *Model interpretability and impact*

Comparing the EHCF Model to our DCF Model showed overlap in the top contributing factors for predicting COVID-19-related death (Figure 6). Age is the feature that plays the most predominant role in both models. Nine of the other top ten ranked predictor variables (diabetes, renal disease,



hypertension, respiratory diseases, sex, predisposition to infection and cardiovascular diseases) were identified in both models. Indeed, the EHCF Model highlights the importance of cardiovascular diseases, diabetes, sex, cardiac diseases, severe respiratory disease, chronic kidney disease, conditions that predispose to infection and cancer. These are mirrored in *DCF 24* (cardiovascular diseases), fingerprint *DCF 22*, (severe diabetes and obesity), fingerprint *DCF 4* (chronic pulmonary disease and tobacco usage), *DCF 18* (chronic kidney failure and hypertension), *DCF 0* (haematological disorders and immunosuppression). *DCF 8* in the DCF Model reflects some preconditions of the female sex (acting as an indicator for the sex variable, see Figure 6) and some associated diseases by concentrating on female-specific cancer codes such as breast cancer and more generic ICD-10 cancer codes such as chemotherapy sessions. Chronic neurological conditions are important predictors in the EHCF Model but this was not directly identified as important in the DCF Model. Instead, the DCF Model puts emphasis on gastrointestinal cancers and disorders of the GI tract through the importance of *DCF 19*, this is a feature not covered in the EHCF Model. Thus, we obtained a different set of features in our comorbidity fingerprinting (DCF), as it encompassed significantly more comorbidities per topic, than feature sets assembled by-hand (EHCF).

## Discussion

Our findings demonstrate how taking a strictly data driven approach using disease codes directly from EHRs can be rapidly leveraged for predicting outcomes and studying disease patterns. The model developed in this study required, in addition to the previously available data (prior to January 2020), only diagnosis information and cause of death, to predict who, with a positive COVID-19 test, was likely to die. Even though our model does not rely on symptoms, laboratory values or images (at the time of diagnosis or during the illness) to predict mortality, we are able to achieve comparably high discrimination results (ROC-AUC of 0.703). Other published COVID-19 prognosis models have AUC-ROC's ranging from 0.68 to 0.90<sup>33-35</sup>. The use of physiological data at the point of admission further makes these models difficult to implement in a community setting or use a specific predefined subset of comorbidities<sup>36</sup>.

In order to evaluate the capabilities of our topic model-based approach to clinical dimensionality reduction, we compared it to current medical risk prediction approaches<sup>19,35</sup>. We opted to develop a set of expert hand-crafted features, built using the CDC and NHS COVID-19 shielding list combined with current research. Our method showed comparable discrimination capabilities, (ROC-AUC of 0.730) to the current expert models (ROC-AUC of 0.734). The significance of our AI-based methodology is highlighted by the ability of our model to encompass the entire past medical history of the participants and, in the context of a new and unknown disease, not be restricted by potentially biased prior belief. In this way, the automated, data-driven approach we present here is able to avoid human-induction bias in the classifier's input features and permits the detection of novel insights in a new disease in a very short amount of time and with minimal human supervision. Furthermore, by ensuring a fully automated process, the methodology we present here is easily scalable to other healthcare systems and generalisable to future events. Furthermore, the DCFs we present here are not specifically tied to COVID-19 risk prediction and can thus be immediately reused to summarise risk predictions for COVID-19 variants or other diseases.

Our study provides results regarding key findings in the underpinning structure of comorbidities and validates the usefulness of these associations with their predictability of COVID-19 mortality. This is of particular importance given the high UK prevalence (18.5 million individuals) of underlying conditions that increase the risk of severe COVID-19<sup>37</sup>. Our DCFs offer a rich and deep set of features, that can succinctly summarise a patient's comorbidity profile using topic modelling. This approach allows for the use of a high-performance AI algorithm whilst remaining clinically interpretable and intuitive. Some obvious common causes of comorbidity clusters are well known (e.g. cardiovascular disease due to smoking or obesity<sup>38</sup>), advances in the science of multi-morbidities are challenging because diseases may have linked or independent causes, combine heterogeneously, are treated differently, and thus affect care pathways and medication strategies. Structuring the myriad of combinations of comorbidities, such as through our comorbidity fingerprinting, underpins any

measures to slow the accumulation of conditions and to optimise their treatment. We have shown that AI methods can help in identifying multimorbidity clusters without human-induction bias, while at the same time ensure that findings remain clinically useful.

We further demonstrate that the DCFs generated using LDA correspond well and show significant variable importance overlap when compared with the EHCF Model and previously identified risk factors from published epidemiological studies. For example, our model supports the previous epidemiological findings that cardiovascular disorders and hypertension increase risk of COVID-19-related death<sup>12,13,19</sup>. Several features identified in the model warrant further evaluation as they were not specifically seen in the initial COVID-19 epidemiological studies. DCF 19 ‘GI Disorders’ was one of the most important features in our model, however many of the epidemiological studies do not report this as a significant risk factor<sup>13,31</sup>.

There are a few limitations to our study. Firstly, our data set while vast, may also reflect the inherent bias of the UK Biobank<sup>39</sup>, which has been discussed in detail elsewhere<sup>39-41</sup>; notably, the demographic reflect a “healthy volunteer” bias, with individuals being generally older, from more educated, less deprived socioeconomic backgrounds, and with significant under-representation of ethnic minorities compared to the UK population. Secondly, testing, treatments, and outcomes of COVID-19 have continuously improved during the study period, thus possibly having a confounding effect on the results. Moreover, due to the limited availability of testing kits for COVID-19, priority was initially offered to those considered at a higher clinical risk, thus potentially leading to an overestimation of severe outcomes in the database. However, these COVID-19 specific data bias factors only affect the mortality prediction but not the structure of the DCFs. This study further relied on retrospective secondary care EHRs and the model is therefore currently blind to conditions entirely managed in primary care, such conditions include many less severe cases of diabetes, asthma and hypertension. At the time of the study, data from primary care was not available. Future work will be needed to

incorporate data from General Practices into the development of the DCFs. Balancing the strengths and limitations, we consider our derivation population to be relevant for the initial exploration of COVID-19 mortality in an older and more 'at risk' population using a machine learning approach. Further research and external validation of the predictive models and DCFs in this study will be required before applying this work in a more general context, specifically to better assess the risk in a younger and fully diverse population.

In conclusion, we developed a novel machine learning based approach to predict COVID-19 mortality in a community cohort only from past EHR data. We have demonstrated the feasibility of a comorbidity clustering approach to avoid human-induction bias and succinctly summarise billions of possible comorbidity combinations in COVID-19 prognosis modelling and thus rapidly leverage vast EHR dataset for outcome prediction. We find, that age and qualitative co-morbidity information are very powerful mortality predictors, making other demographic or physiological data pale in comparison. This implies, that in rapid decision situations or decisions with limited information will benefit from our solution as this enables healthcare professionals to form a rapid picture from information that patients and their relatives are familiar with and which do not change rapidly, unlike data such as blood pressure. Thus, our model may enable early stratification of key clinical risk groups thus permitting earlier intervention and may help better prioritise risk groups in the global vaccination effort.

Crucially, however, our DCF framework can be applied to any other form of novel disease as the multi-morbidity features we discovered span a space that is disease agnostic.

## **Methods**

### *Study design and participants*

We conducted a prospective open cohort study using the Hospital Episode Statistics for England (HES) database, COVID-19 test results and death data linked through the UK Biobank (see 'Data Source'). The cohort study began on 30 January 2020, which was chosen as it corresponds to the day of the first laboratory-confirmed case of COVID-19 in the UK<sup>42</sup>; and ended on 9 September 2020. The cohort study examines risk among the population of patients who are positive for COVID-19. Therefore, we only included patients from the UK Biobank if they had a positive SARS-COV-2 test result or a COVID-19 diagnosis code recorded in their clinical notes (ICD-10 code U071 or U072).

#### *Data source and ethical approval*

The UK Biobank is a large prospective population cohort of 502,505 participants aged 40-70 years at baseline, prepared to travel to 1 of 22 assessment centres in England, Scotland, and Wales<sup>23</sup>. All participants were recruited between 2006 and 2010, and all consented to have their health followed<sup>23</sup>. Baseline assessments include nurse-led interviews surrounding socio-demographics, lifestyle, physiological measurements, and medical history. Health outcomes were sourced from linkages to electronic medical records. UK Biobank obtained approval from the North West Multi-Centre Research Ethics Committee (MREC), and the Community Health Index Advisory Group (CHIAG). All participants provided written informed consent prior to enrolment in the study. The UK Biobank protocol is available online<sup>43</sup>.

In the context of the COVID-19 pandemic, the UK Biobank has implemented a rapid and dynamic linkage between the laboratory results for COVID-19, stored on Public Health England's Second-Generation Surveillance System, and the UK Biobank participants<sup>24</sup>. The previous hospital medical information of the study participants was obtained from linkage to the HES database (a data

warehouse containing records of all admissions, emergency room attendances and outpatients appointments at NHS hospitals in England)<sup>44</sup>.

Access to anonymised data for the UK Biobank cohort was granted by the UK Biobank Access Management Team (application number 21770). Ethical approval was granted by the national research ethics committee (REC 16/NW/0274) for the overall UK Biobank cohort.

### *Outcome*

The primary outcome measure was COVID-19-related death in patients with a COVID-19 infection. Confirmation of a COVID-19-related death COVID-19 death was defined as 1) a COVID-19-related death recorded in ONS death certificate data (International Classification of Disease, 10th edition, ICD-10 codes U071 or U072). 2) a death occurring within 28 days of a laboratory-confirmed COVID-19 infection (as per UK government guidelines<sup>45</sup>).

### *Model Development*

The performance of machine learning methods is heavily dependent on the selection of features<sup>46</sup>. For that reason, most of the effort in an analytic model is spent pre-processing, merging, customizing, and cleaning datasets. This task is made all the more complicated in EHRs as the different predictors may number the tens of thousands (over 11,700 are present in the UK Biobank). Traditional modelling approaches deal with this complexity by choosing a limited number of variables and creating custom features<sup>47</sup>. However, this is a largely manual and often labour-intensive task. Another common

approach is to use unsupervised dimensionality reduction approaches, this is often far faster but may yield results that are less accurate or interpretable.

### *Hand-Crafted features: Predictor variables*

The patient-level characteristics included in the development of the EHCF Model were selected from the existing health conditions listed on original population-level risk stratification method as exercised in UK<sup>17</sup> or listed by the Centers for Disease Control and Prevention (CDC) as defining ‘people at increased risk for severe illness’<sup>18</sup>. This was further complemented with other emerging risk factors for severe outcomes of COVID-19 (such as raised blood pressure)<sup>9,12,13,19</sup>. The final predictor variables chosen are summarised in Box 1.

Demographic and lifestyle variables were also included, namely: age, sex, Townsend deprivation index<sup>48</sup>, ethnicity, and smoking status. Age groups were categorised as 50-60, 60-70, 70-80 and 80+ years. Deprivation was measured using the Townsend Deprivation Index (grouped into quartiles based on the entire UK Biobank distribution, greater scores imply a greater degree of deprivation). Ethnicity was grouped as white and non-white (thus collapsing the UK Biobank categories mixed, asian, black or chinese), due to the otherwise small number of participants in each of the specific categories. Smoking status was determined from data from the initial UK Biobank assessment and grouped into participants that smoke or have smoked (current or previous at baseline) and participants that, at baseline, were never smokers.

The demographic variables considered as potential factors affecting COVID-19 risk and were determined using the answers given at UK Biobank initial assessment centre. Age was determined on

30 January 2020. Information on all other covariate variables was determined using the ICD-10 codes in the linked HES database.

### *Automated features: topic modelling*

Topic modelling was originally developed as a tool to model collections of discrete data with particular application in text modelling and Natural Language Processing (NLP). Topic modelling can discover abstract ‘topics’ within a collection of documents, where a topic consists of a collection of words that frequently occur together. Here we opted to train topic models using Latent Dirichlet Allocation (LDA), an unsupervised and interpretable method for topic modelling<sup>49,50</sup>. LDA is a Bayesian probabilistic model that works by taking as input a corpus of clinical codes and represents each document as a finite mixture of an underlying set of fixed topics, with each topic characterised by its distribution over words<sup>49,51</sup>.

Here, LDA is used to represent a patient  $p$  as a mixture over the collection of  $K$  “topics”. Each topic  $k$  defines a multinomial distribution over a finite vocabulary of ICD-10 diagnosis codes and is assumed to have been drawn from a Dirichlet,  $\beta_k \sim \text{Dirichlet}(\eta)$ . Thus, each code  $c_{p,n}$  has a given probability  $\beta_k$  in each topic  $k$ . Given the topics, LDA then generates for each patient  $p$  a distribution over topics  $\theta_p \sim \text{Dirichlet}(\alpha)$ . In other words, each topic is determined as a distribution over closely related codes and each patient is represented as a distribution over multiple topics. For simplicity, we assumed symmetric priors on the patient topic distribution  $\theta$  and the code topic distribution  $\beta$ .

For each participant of the UK Biobank, we considered a full longitudinal visit history to hospital, including all admissions, emergency room attendances and outpatient appointments. For each recorded hospital episode, we extracted a list of diagnosis codes, using the ICD-10. This generated a document



for each unique patient in the UK Biobank, representing their full hospital visit history as a series of ‘sentences’ (one for each visit, so if a patient visit the hospital 10 times for asthma it is represented 10 times in their record.), wherein each ‘word’ was a unique ICD-10 diagnosis code. Thus, this way of accounting naturally weighs conditions that require more frequent visits to the hospital.

The LDA topic model was trained using as input the corpus of documents (i.e. sentences of ICD-10 diagnosis codes) for the entirety of the UK Biobank population that is not lost to follow up, still alive on 30 January 2020 and is part of the HES database (‘Population part of the HES database’, Fig. 1). This was chosen with the aim of generating more clinically robust and disease agnostic topics (i.e. the topics formed are not specific to any prior comorbidity). From this corpus, we used a grid-searching method to determine the optimal number  $K$  of topics, and the prior value for  $\theta$  and  $\beta$  ( $\alpha$  and  $\eta$ ) when optimising with respect to model coherence,  $C_v$  in<sup>32</sup> as this method has been shown to achieve the highest correlation with human topic ranking data<sup>32,52</sup>. This model was implemented using the gensim library in the Python programming language<sup>53</sup>.

#### *Development of a random forest model*

Two predictive classifiers were trained in this study, EHCF Model and DCF Model. The first, EHCF Model, uses as input the ‘manually’ determined participant characteristics or ‘Hand-Crafted Features’ (see Hand-Crafted features: Predictor variables). These were grouped into the aforementioned categories and each participant was set a binary value indicating whether or not their past medical records (extracted from the HES database) showed the occurrence of at least one of the conditions for each category. The DCF Model, on the other hand, uses the patients’ distribution over the previously derived topics of an LDA topic model as input to a classifier. The LDA model was further complemented with the demographic and lifestyle variables (e.g. age).

The models described above were trained to predict the same binary output; the patients that survived were assigned to class 0 and those that died to class 1.

In this study, we opted for use of a random forest (RF) classifier<sup>54</sup>, to determine COVID-19 associated mortality. RF is a high-performance ML algorithm that fits several decision tree classifiers on various sub-samples of the dataset and, subsequently, averages these tree predictors<sup>54</sup>. This allows for a reduction in over-fitting and improvement in accuracy. We implemented all RF models using the Scikit-learn library in python programming language<sup>55</sup>. The models' hyper-parameters<sup>56-59</sup> were determined via grid search with AUC as the response as it yields a finer evaluation than commonly used error rates<sup>58</sup>.

The overview of the pipeline used for DCF Model is illustrated in Figure 7. Figure 7 describes the learning of topics from the data and shows how we use the distribution of each patient over each of these topics as input to a RF classifier.

### *Variable ranking*

In order to better understand the predictor variables that may lead to increased risk of a COVID-19-related death and their interactions, we use an impurity-based approach to rank the contribution of the different variables in the prediction made by the model. This resulting variable importance score reflects the relative impact that each variable has on the prediction issued by the model.

We chose to use a RF algorithm for this analysis because it is a non-parametric algorithm that can recognise complex patterns and automatically capture nonlinear and interaction effects without specifying these a priori<sup>60</sup>.

### *Statistical analysis*

Study participant numbers are depicted in the flow chart (Figure 1). For each of the ‘Hand-Crafted’ patient characteristics (see Hand-Crafted features: Predictor variables), a logistic regression model was fitted with the COVID-19-related death as the outcome in order to determine a univariate (not-adjusted) Odds Ratio (OR). All patients’ characteristics were subsequently included in a single multivariable logistic regression to determine the adjusted OR. All OR from the univariable and multivariable logistic regression models are reported with 95% confidence intervals. For the purpose of this study, the logistic regression model was not considered for its predictive power but rather for its ability to simply and accurately describe the available data.

The HES data were considered complete with no missing data for our population. Participants with missing smoking information were assumed to be non-smokers. Missing deprivation score was imputed using the median value of the entire UK Biobank cohort. The participants with missing ethnicity were dropped from the study as no reliable way could be determined to input this field.

We subsequently developed RF based models in order to assess discrimination capability and compare variable importance. In order to avoid over-fitting, we evaluated the prediction accuracy of these models using 10-fold stratified cross-validation and calculated the area under the AUC-ROC as a measure of model discrimination. In every cross-validation fold, a training sample (90% of the participants) was used to derive the models, and then a hold-out sample (10% of the participants) was

used for performance evaluation. We report the mean AUC-ROC and the 95% confidence intervals for all models. In all RF models, age and deprivation score are considered as continuous variables.

## Data Availability

The UK Biobank cohort data that supports the findings of this study is available to researchers as approved by the Biobank Access Management Team.

## References

1. WHO. WHO Director-General's opening remarks at the media briefing on COVID-19 - 11 March 2020. <https://www.who.int/director-general/speeches/detail/who-director-general-s-opening-remarks-at-the-media-briefing-on-covid-19---11-march-2020> (2020).
2. WHO. Coronavirus disease (COVID-19): Weekly Epidemiological Update. <https://www.who.int/emergencies/diseases/novel-coronavirus-2019/situation-reports> (2020).
3. Arabi, Y. M., Murthy, S. & Webb, S. COVID-19: a novel coronavirus and a novel challenge for critical care. *Intensive Care Med.* 1–4 (2020).
4. Grasselli, G., Pesenti, A. & Cecconi, M. Critical care utilization for the COVID-19 outbreak in Lombardy, Italy: early experience and forecast during an emergency response. *Jama* **323**, 1545–1546 (2020).
5. Jordan, R. E., Adab, P. & Cheng, K. K. Covid-19: risk factors for severe disease and death. (2020).
6. Onder, G., Rezza, G. & Brusaferro, S. Case-fatality rate and characteristics of patients dying in relation to COVID-19 in Italy. *Jama* **323**, 1775–1776 (2020).

7. Zhou, F. *et al.* Clinical course and risk factors for mortality of adult inpatients with COVID-19 in Wuhan, China: a retrospective cohort study. *Lancet* (2020).
8. Garg, S. Hospitalization rates and characteristics of patients hospitalized with laboratory-confirmed coronavirus disease 2019—COVID-NET, 14 States, March 1--30, 2020. *MMWR. Morb. Mortal. Wkly. Rep.* **69**, (2020).
9. Richardson, S. *et al.* Presenting characteristics, comorbidities, and outcomes among 5700 patients hospitalized with COVID-19 in the New York City area. *Jama* (2020).
10. Guan, W. *et al.* Clinical characteristics of coronavirus disease 2019 in China. *N. Engl. J. Med.* **382**, 1708–1720 (2020).
11. Jin, J.-M. *et al.* Gender differences in patients with COVID-19: Focus on severity and mortality. *Front. Public Heal.* **8**, 152 (2020).
12. Deng, G., Yin, M., Chen, X. & Zeng, F. Clinical determinants for fatality of 44,672 patients with COVID-19. *Crit. Care* **24**, 1–3 (2020).
13. Docherty, A. B. *et al.* Features of 16,749 hospitalised UK patients with COVID-19 using the ISARIC WHO Clinical Characterisation Protocol. *medRxiv* (2020).
14. House, N., Holborn, H. & Wc, L. ICNARC report on COVID-19 in critical care. *Publ. online* **26**, 24 (2020).
15. Patel, B. V *et al.* Natural history, trajectory, and management of mechanically ventilated COVID-19 patients in the United Kingdom. *medRxiv* (2020).
16. Wynants, L. *et al.* Prediction models for diagnosis and prognosis of covid-19 infection: systematic review and critical appraisal. *bmj* **369**, (2020).
17. Digital, N. Covid-19—high risk shielded patient list identification methodology. <https://digital.nhs.uk/coronavirus/shielded-patient-list/methodology>.
18. CDC. Covid-19: People at Increased Risk. [21](https://www.cdc.gov/coronavirus/2019-ncov/need-</a></li></ol></div><div data-bbox=)

- extra-precautions/people-with-medical-conditions.html (2020).
19. Clift, A. K. *et al.* Living risk prediction algorithm (QCOVID) for risk of hospital admission and mortality from coronavirus 19 in adults: national derivation and validation cohort study. *bmj* **371**, (2020).
  20. The Academy of Medical Sciences. Multimorbidity: a priority for global health research. <https://Acmedsci.Ac.Uk/Policy/Policy-Projects/Multiple-Morbidities-As-a-Global-Health-Challenge> (2015).
  21. Barnett, K. *et al.* Epidemiology of multimorbidity and implications for health care, research, and medical education: A cross-sectional study. *Lancet* (2012) doi:10.1016/S0140-6736(12)60240-2.
  22. Rich, A. S. & Gureckis, T. M. Lessons for artificial intelligence from the study of natural stupidity. *Nature Machine Intelligence* (2019) doi:10.1038/s42256-019-0038-z.
  23. Sudlow, C. *et al.* UK biobank: an open access resource for identifying the causes of a wide range of complex diseases of middle and old age. *Plos med* **12**, e1001779 (2015).
  24. Armstrong, J. *et al.* Dynamic linkage of COVID-19 test results between Public Health England's second generation surveillance system and UK biobank. *Microb. genomics* **6**, e000397 (2020).
  25. Alaa, A. M., Bolton, T., Angelantonio, E. Di, Rudd, J. H. F. & van der Schaar, M. Cardiovascular disease risk prediction using automated machine learning: A prospective study of 423,604 UK Biobank participants. *PLoS One* (2019) doi:10.1371/journal.pone.0213653.
  26. Weng, S. F., Vaz, L., Qureshi, N. & Kai, J. Prediction of premature all-cause mortality: A prospective general population cohort study comparing machine-learning and standard epidemiological approaches. *PLoS One* (2019) doi:10.1371/journal.pone.0214365.
  27. Hippisley-Cox, J. & Coupland, C. Development and validation of risk prediction algorithms to estimate future risk of common cancers in men and women: Prospective cohort study. *BMJ*

- Open* (2015) doi:10.1136/bmjopen-2015-007825.
28. Clift, A. K. *et al.* Development and validation of risk scores for all-cause mortality for a smartphone-based ‘general health score’ application: a prospective cohort study using the UK Biobank (Preprint). *JMIR mHealth uHealth* (2020) doi:10.2196/25655.
  29. Jain, V. & Yuan, J.-M. Systematic review and meta-analysis of predictive symptoms and comorbidities for severe COVID-19 infection. *medRxiv* (2020).
  30. Chen, T. *et al.* Clinical characteristics of 113 deceased patients with coronavirus disease 2019: retrospective study. *Bmj* **368**, (2020).
  31. Wu, Z. & McGoogan, J. M. Characteristics of and important lessons from the coronavirus disease 2019 (COVID-19) outbreak in China: summary of a report of 72 314 cases from the Chinese Center for Disease Control and Prevention. *Jama* **323**, 1239–1242 (2020).
  32. Röder, M., Both, A. & Hinneburg, A. Exploring the space of topic coherence measures. in *Proceedings of the eighth ACM international conference on Web search and data mining* 399–408 (2015).
  33. Carr, E. *et al.* Supplementing the National Early Warning Score (NEWS2) for anticipating early deterioration among patients with COVID-19 infection. *medRxiv* (2020).
  34. Zhang, H. *et al.* Risk prediction for poor outcome and death in hospital in-patients with COVID-19: derivation in Wuhan, China and external validation in London, UK. (2020).
  35. Knight, S. R. *et al.* Risk stratification of patients admitted to hospital in the United Kingdom with covid-19 using the ISARIC WHO Clinical Characterisation Protocol: development and validation of a multivariable prediction model for mortality. *Br. Med. J.* (2020).
  36. Williams, R. D. *et al.* Seek COVER: Development and validation of a personalized risk calculator for COVID-19 outcomes in an international network. *medRxiv* (2020).
  37. Walker, J. L. *et al.* UK prevalence of underlying conditions which increase the risk of severe

- COVID-19 disease: a point prevalence study using electronic health records. *BMC Public Health* **21**, 484 (2021).
38. Vetrano, D. L. *et al.* Twelve-year clinical trajectories of multimorbidity in a population of older adults. *Nat. Commun.* (2020) doi:10.1038/s41467-020-16780-x.
39. Fry, A. *et al.* Comparison of sociodemographic and health-related characteristics of UK Biobank participants with those of the general population. *Am. J. Epidemiol.* **186**, 1026–1034 (2017).
40. Weng, S. F., Reys, J., Kai, J., Garibaldi, J. M. & Qureshi, N. Can machine-learning improve cardiovascular risk prediction using routine clinical data? *PLoS One* **12**, e0174944 (2017).
41. Ganna, A. & Ingelsson, E. 5 year mortality predictors in 498 103 UK Biobank participants: a prospective population-based study. *Lancet* **386**, 533–540 (2015).
42. Gov.UK. Coronavirus (COVID-19) cases in the UK.  
<https://web.archive.org/web/20200502045059/https://coronavirus.data.gov.uk/> (2020).
43. Palmer, L. J. UK Biobank: bank on it. *Lancet* **369**, 1980–1982 (2007).
44. Adamska, L. *et al.* Challenges of linking to routine healthcare records in UK Biobank. *Trials* **16**, 1 (2015).
45. GOV.UK. New UK-wide methodology agreed to record COVID-19 deaths. (2020).
46. Bengio, Y., Courville, A. & Vincent, P. Representation learning: A review and new perspectives. *IEEE Trans. Pattern Anal. Mach. Intell.* **35**, 1798–1828 (2013).
47. Goldstein, B. A., Navar, A. M., Pencina, M. J. & Ioannidis, J. Opportunities and challenges in developing risk prediction models with electronic health records data: a systematic review. *J. Am. Med. Informatics Assoc.* **24**, 198–208 (2017).
48. Black, D. *Inequalities in health: the Black report*. (Penguin Books, 1982).
49. Blei, D. M., Ng, A. Y. & Jordan, M. I. Latent dirichlet allocation. *J. Mach. Learn. Res.* **3**, 993–



- 1022 (2003).
50. Blei, D. M. Probabilistic topic models. *Commun. ACM* **55**, 77–84 (2012).
  51. Griffiths, T. L. & Steyvers, M. Finding scientific topics. *Proc. Natl. Acad. Sci.* **101**, 5228–5235 (2004).
  52. Syed, S. & Spruit, M. Full-text or abstract? Examining topic coherence scores using latent dirichlet allocation. in *2017 IEEE International conference on data science and advanced analytics (DSAA)* 165–174 (2017).
  53. Rehurek, R. & Sojka, P. Software Framework for Topic Modelling with Large Corpora. *Proc. Lr. 2010 Work. New Challenges NLP Fram.* (2010).
  54. Breiman, L. Random forests. *Mach. Learn.* **45**, 5–32 (2001).
  55. Pedregosa, F. *et al.* Scikit-learn: Machine learning in Python. *J. Mach. Learn. Res.* (2011).
  56. Huang, B. F. F. & Boutros, P. C. The parameter sensitivity of random forests. *BMC Bioinformatics* **17**, 331 (2016).
  57. Probst, P., Wright, M. N. & Boulesteix, A.-L. Hyperparameters and tuning strategies for random forest. *Wiley Interdiscip. Rev. Data Min. Knowl. Discov.* **9**, e1301 (2019).
  58. Probst, P. & Boulesteix, A.-L. To tune or not to tune the number of trees in random forest. *J. Mach. Learn. Res.* **18**, 6673–6690 (2017).
  59. Boulesteix, A.-L., Janitza, S., Kruppa, J. & König, I. R. Overview of random forest methodology and practical guidance with emphasis on computational biology and bioinformatics. *Wiley Interdiscip. Rev. Data Min. Knowl. Discov.* **2**, 493–507 (2012).
  60. Wright, M. N., Ziegler, A. & König, I. R. Do little interactions get lost in dark random forests? *BMC Bioinformatics* **17**, 145 (2016).

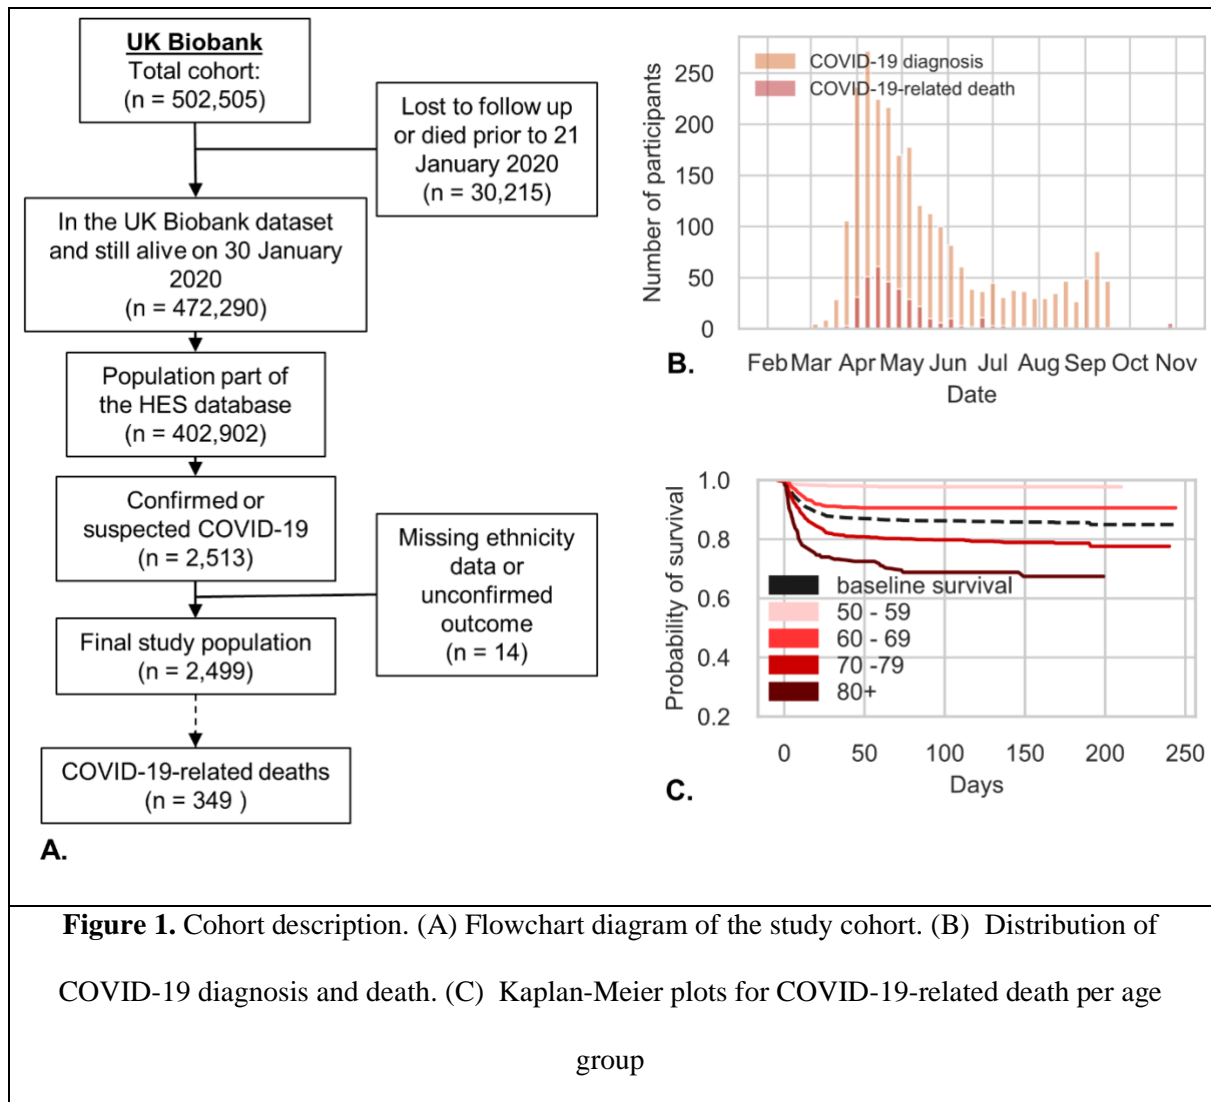

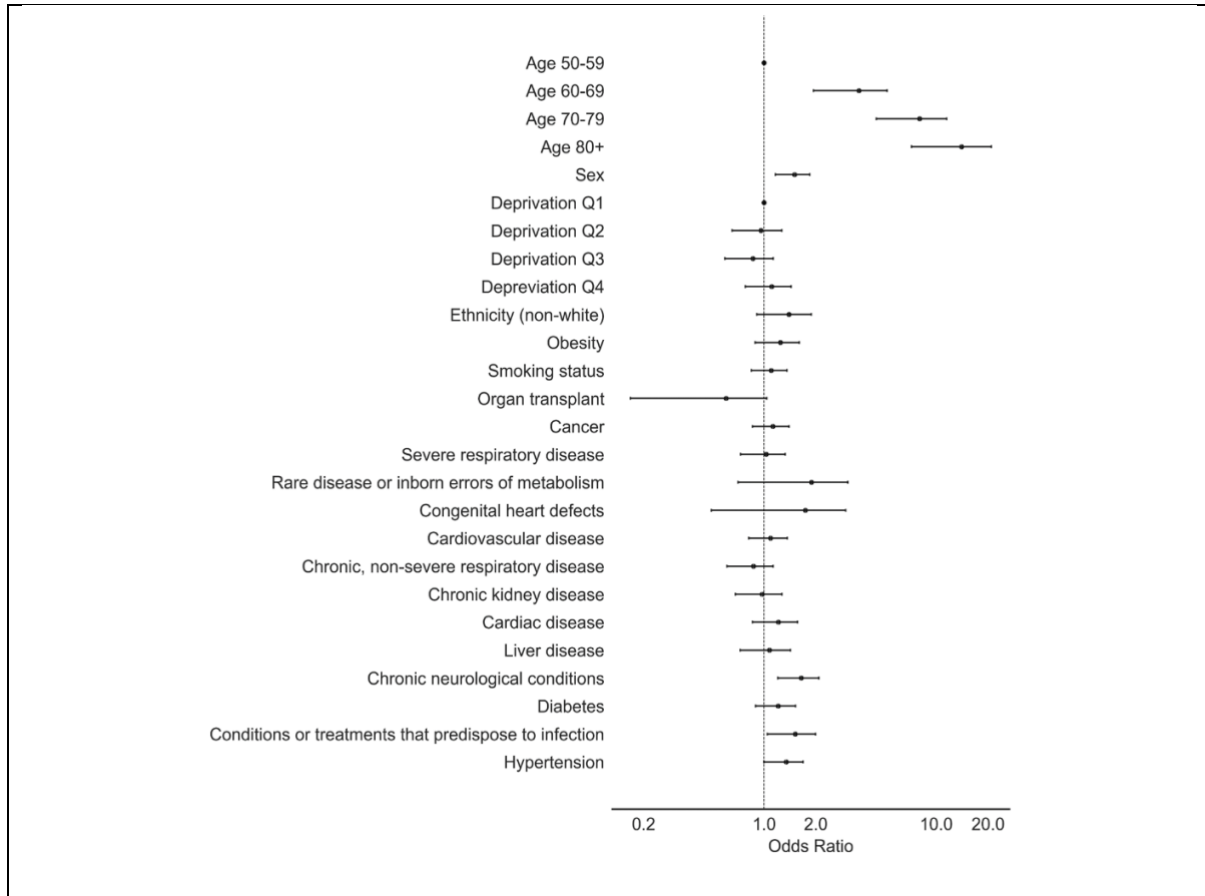

**Figure 2.** Estimated Odds Ratio for each patient characteristic from a multivariable logistic regression

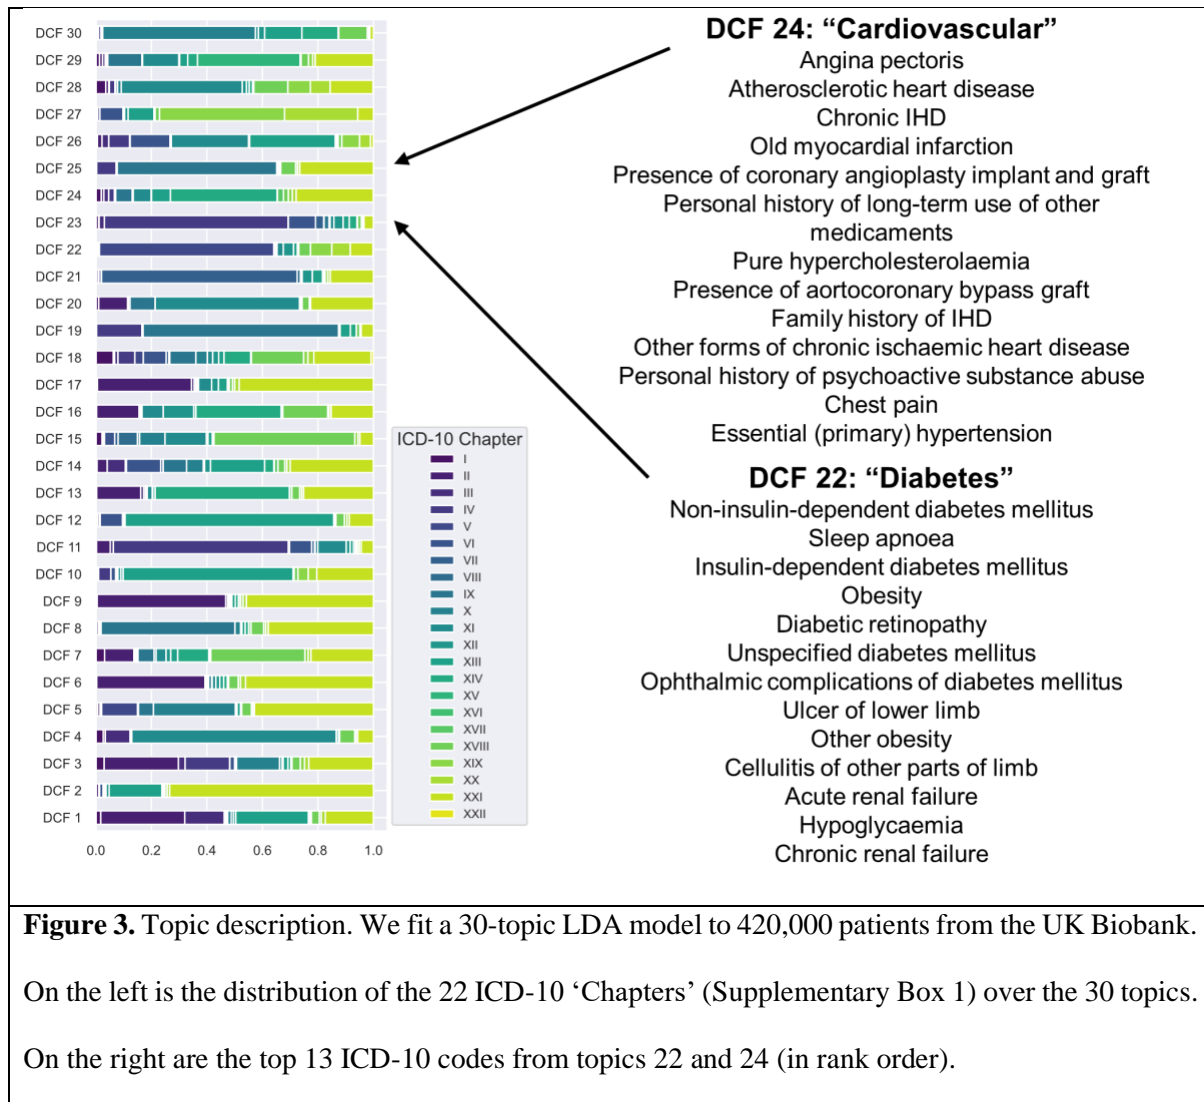

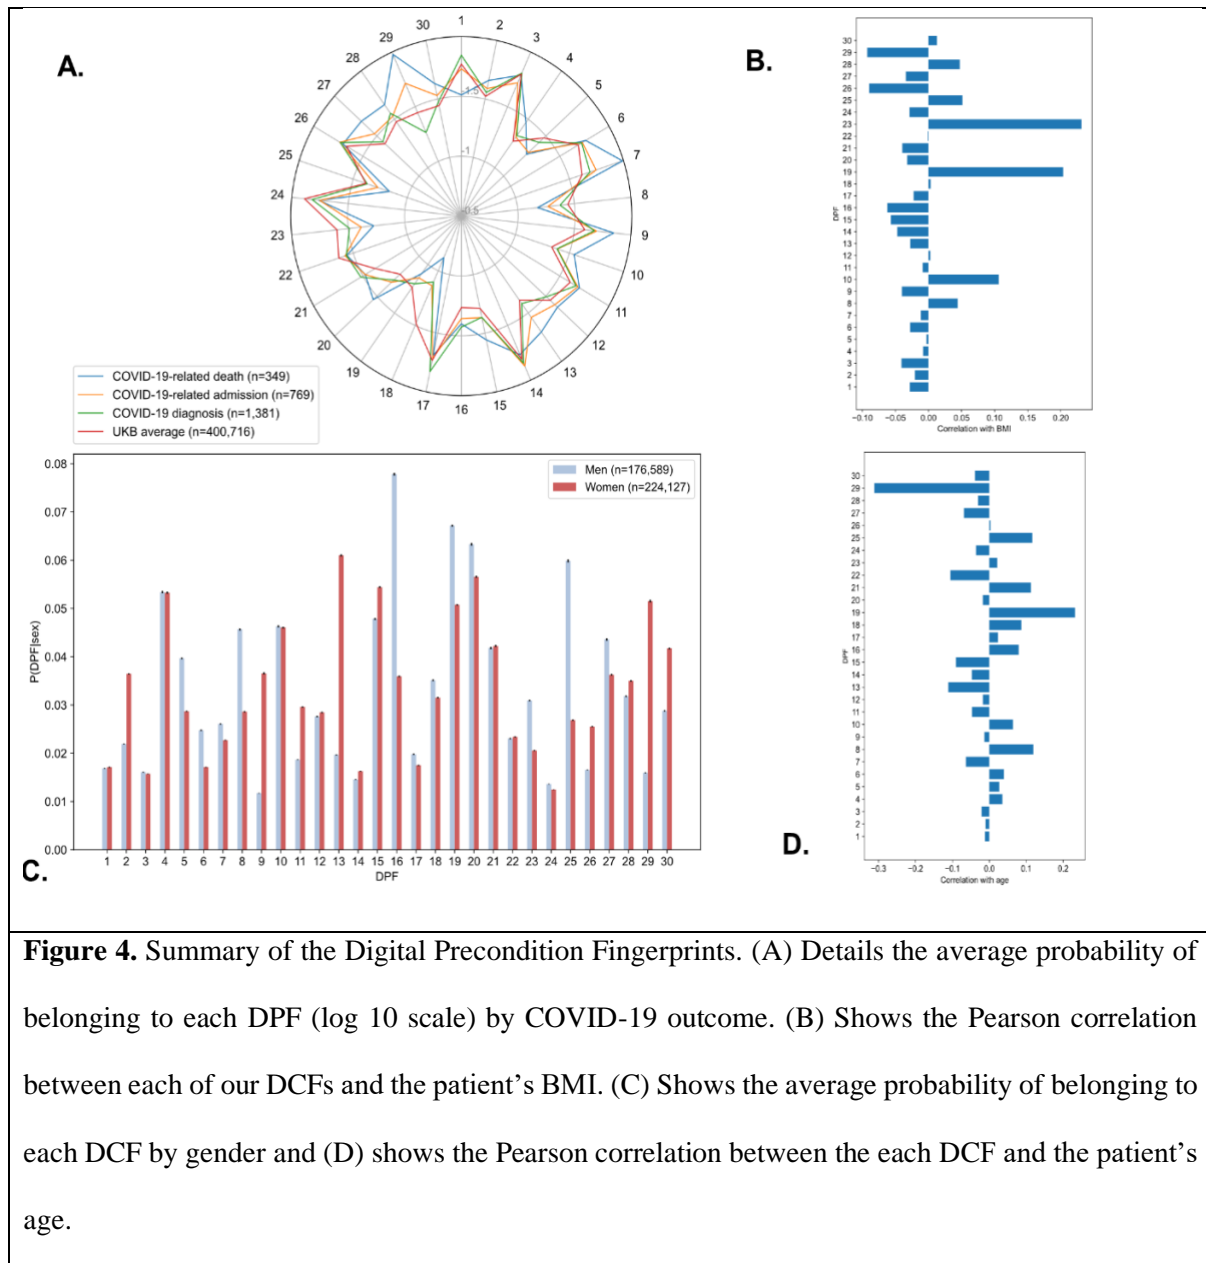

**Figure 4.** Summary of the Digital Precondition Fingerprints. (A) Details the average probability of belonging to each DPF (log 10 scale) by COVID-19 outcome. (B) Shows the Pearson correlation between each of our DCFs and the patient's BMI. (C) Shows the average probability of belonging to each DCF by gender and (D) shows the Pearson correlation between the each DCF and the patient's age.

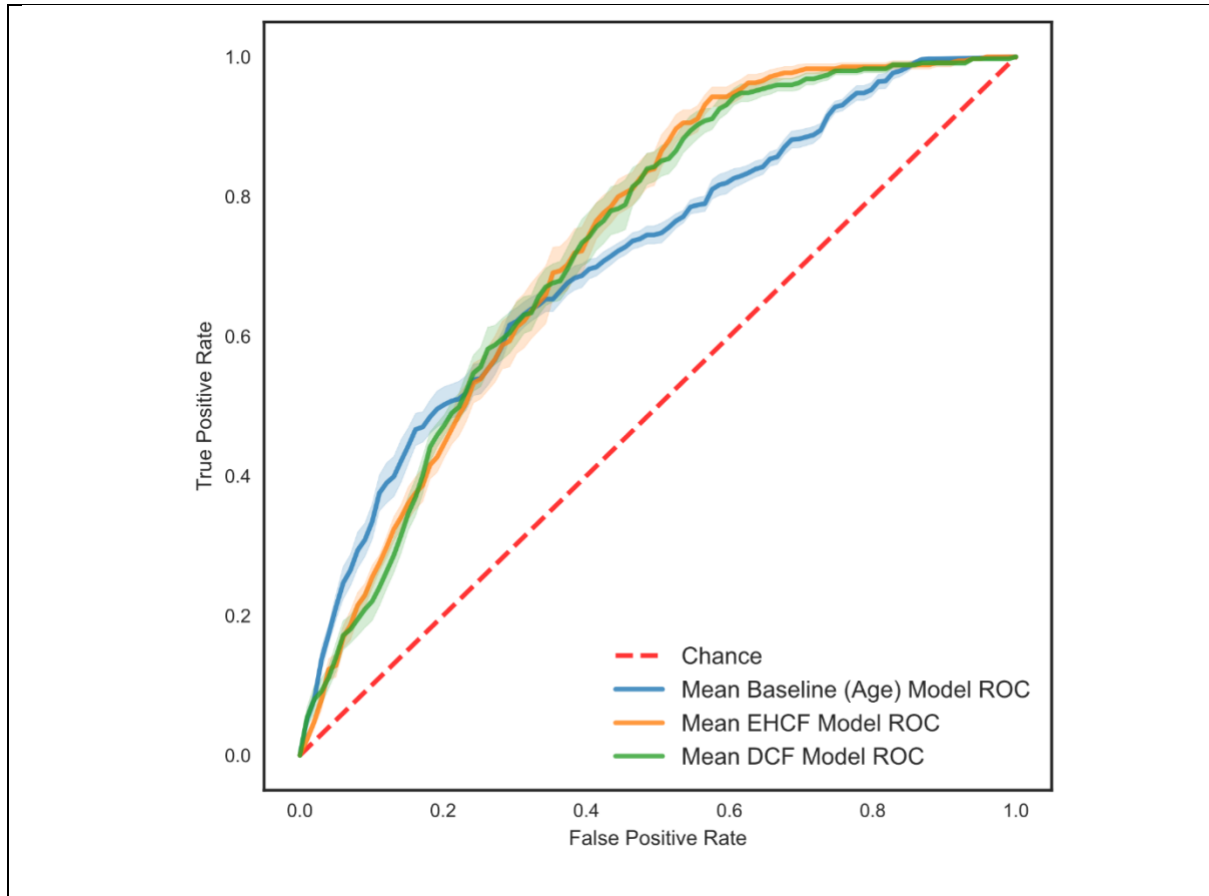

**Figure 5.** Mean receiver operating characteristic curves derived from predicting COVID-19-related death in the 10-Fold Cross Validation (standard error of the mean) for all models.

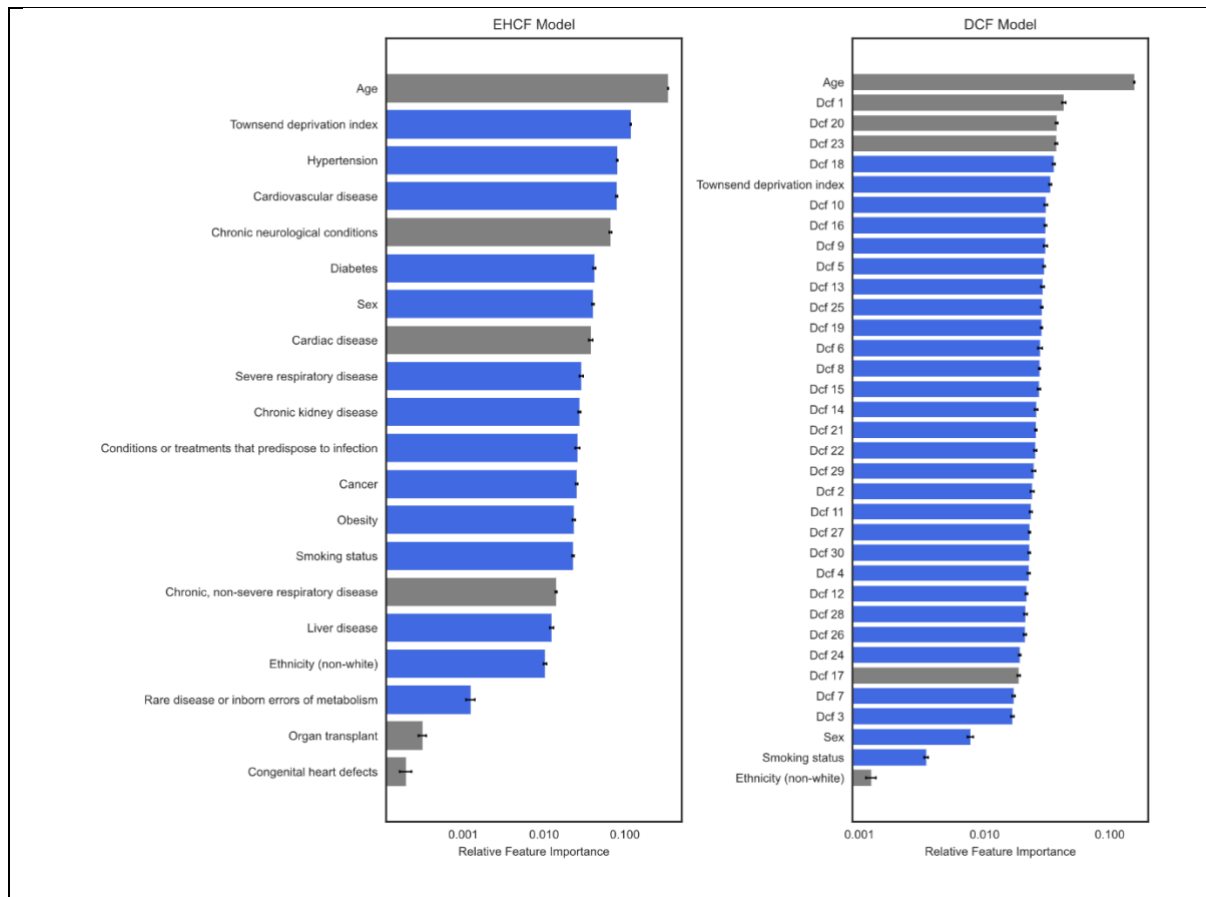

**Figure 6.** Comparison of relative feature importance (note logarithmic scale) showing the contribution to the predictions of the EHCF and our DCF Model. In grey the demographic and lifestyle features which were the same in both models and in blue the model specific features. Note, how in the DCF Model aside from age the co-morbidity and multi-morbidity make up the key 15 features.

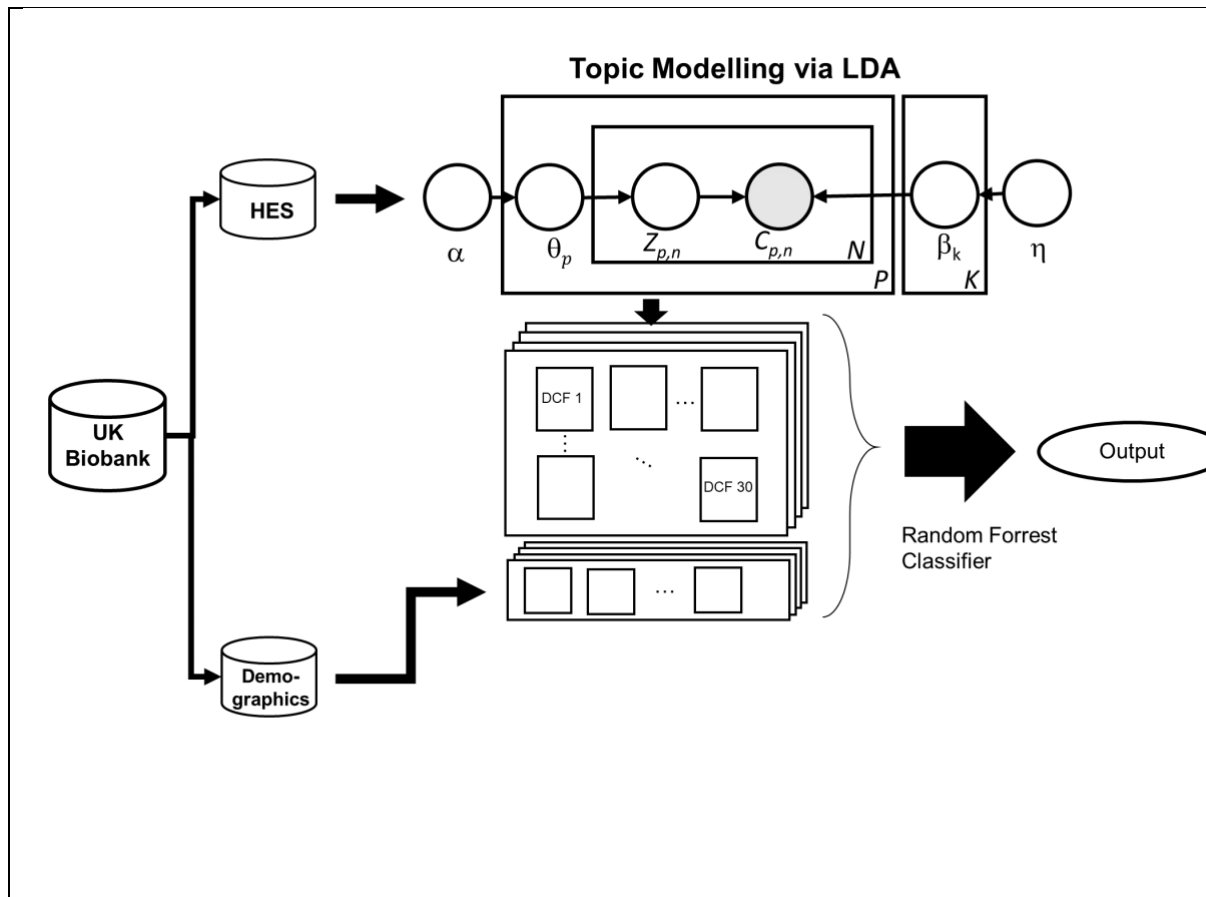

**Figure 7.** Illustration of the overall study design for the DCF Model. First, we separate the UK Biobank into HES and demographic data, we generate the features (using LDA) from the discrete input of the HES database. We subsequently use the distribution of each patient over these features as input to a supervised random forest classifier to predict COVID-19 fatality.

**Box 1.** Hand-Crafted Predictor variables

| Demographics                                                                                                                |
|-----------------------------------------------------------------------------------------------------------------------------|
| <ul style="list-style-type: none"> <li>• Age in years</li> <li>• Townsend deprivation index</li> <li>• Ethnicity</li> </ul> |



|                                                                                                                                                                                                                                                                                                                                                                                                                                                                                                                                                                                                                                                                                                                     |
|---------------------------------------------------------------------------------------------------------------------------------------------------------------------------------------------------------------------------------------------------------------------------------------------------------------------------------------------------------------------------------------------------------------------------------------------------------------------------------------------------------------------------------------------------------------------------------------------------------------------------------------------------------------------------------------------------------------------|
| <ul style="list-style-type: none"><li>○ White</li><li>○ Non-white</li></ul>                                                                                                                                                                                                                                                                                                                                                                                                                                                                                                                                                                                                                                         |
| <b>Lifestyle</b>                                                                                                                                                                                                                                                                                                                                                                                                                                                                                                                                                                                                                                                                                                    |
| <ul style="list-style-type: none"><li>• Smoking status<ul style="list-style-type: none"><li>○ Current or previous smoker</li><li>○ Never smoked at UK Biobank baseline</li></ul></li></ul>                                                                                                                                                                                                                                                                                                                                                                                                                                                                                                                          |
| <b>Conditions associated with high risk (clinically extremely vulnerable) on current shielded patient list as per NHS guidance</b>                                                                                                                                                                                                                                                                                                                                                                                                                                                                                                                                                                                  |
| <ul style="list-style-type: none"><li>• Solid organ transplant</li><li>• Cancers</li><li>• Severe respiratory disease<ul style="list-style-type: none"><li>○ Chronic obstructive pulmonary disease (COPD, emphysema and chronic bronchitis)</li><li>○ Status Asthmaticus</li><li>○ Cystic fibrosis, interstitial lung diseases, sarcoidosis, pulmonary hypertension</li></ul></li><li>• Rare disease or inborn errors of metabolism<ul style="list-style-type: none"><li>○ Sickle-cell disorders</li><li>○ Immunodeficiency</li><li>○ Severe metabolic disorders (e.g amino-acid metabolism disorders)</li><li>○ Congenital malformations (e.g Phakomatoses)</li></ul></li><li>• Congenital heart defects</li></ul> |
| <b>Conditions associated with an increased risk for severe COVID-19 as per CDC guidance (not already considered)</b>                                                                                                                                                                                                                                                                                                                                                                                                                                                                                                                                                                                                |
| <ul style="list-style-type: none"><li>• Cardiovascular disease<ul style="list-style-type: none"><li>○ Conduction disorders (e.g atrial fibrillation)</li></ul></li></ul>                                                                                                                                                                                                                                                                                                                                                                                                                                                                                                                                            |

- Past cardiovascular event (e.g myocardial infarction, stroke, angina)
- Peripheral vascular disease
- Endocarditis
- HIV

**Conditions associated with a moderate risk (clinically vulnerable) as per NHS guidance**

- Chronic, non-severe respiratory disease
  - Asthma
  - Hypersensitivity pneumonitis
- Chronic kidney disease
  - CKD  $\geq$  stage 3
  - End stage renal failure involving dialysis
  - End stage renal failure involving a transplant
- Cardiac disease
  - Heart failure
  - Valve disorders
- Liver disease
  - Chronic hepatitis
  - Alcoholic liver disease
  - Toxic liver disease
  - Other causes of liver cirrhosis
- Chronic neurological conditions
  - Motor neurone disease
  - Parkinson's disease
  - Multiple sclerosis

|                                                                                                                                                                                                                                                                                                                                                                                                                                                                                                                                                                                                                                                                                                                    |
|--------------------------------------------------------------------------------------------------------------------------------------------------------------------------------------------------------------------------------------------------------------------------------------------------------------------------------------------------------------------------------------------------------------------------------------------------------------------------------------------------------------------------------------------------------------------------------------------------------------------------------------------------------------------------------------------------------------------|
| <ul style="list-style-type: none"> <li>○ Myasthenia gravis</li> <li>○ Cerebral palsy</li> <li>○ Epilepsy</li> <li>○ Down’s syndrome</li> <li>○ Dementia (vascular or Alzheimer’s)</li> <li>• Diabetes <ul style="list-style-type: none"> <li>○ Type 1</li> <li>○ Type 2</li> </ul> </li> <li>• Immunocompromised states (including conditions or treatments that predispose to infection (e.g. steroid treatment) <ul style="list-style-type: none"> <li>○ Rheumatoid arthritis</li> <li>○ Systemic lupus erythematosus</li> <li>○ Psoriasis</li> <li>○ Ankylosing spondylitis</li> <li>○ Connective tissue diseases (e.g. Ehlers-Danlos)</li> <li>○ Vasculitis (e.g. giant cell arteritis)</li> </ul> </li> </ul> |
| <b>Other emerging risk factors for severe outcomes of COVID-19</b>                                                                                                                                                                                                                                                                                                                                                                                                                                                                                                                                                                                                                                                 |
| <ul style="list-style-type: none"> <li>• Hypertension</li> </ul>                                                                                                                                                                                                                                                                                                                                                                                                                                                                                                                                                                                                                                                   |

**Table 1.** Descriptive characteristics of the UK Biobank cohort by COVID-19 fatality and Odds ratios and 95 % confidence intervals for COVID-19-related death

|  | <b>COVID-19-related death<br/>(n = 349)</b> | <b>Rest of the Cohort (n = 2150)</b> | <b>OR (95% CI)</b> | <b>Fully adjusted OR (95% CI)</b> |
|--|---------------------------------------------|--------------------------------------|--------------------|-----------------------------------|
|  |                                             |                                      |                    |                                   |

|                       |              |                  |                       |                      |
|-----------------------|--------------|------------------|-----------------------|----------------------|
| Age 50-59             | 14 (4.01%)   | 619<br>(28.79%)  | 1                     | 1                    |
| Age 60-69             | 55 (15.76%)  | 537<br>(24.98%)  | 4.53 (2.49 - 8.23)    | 3.56 (1.93 - 6.54)   |
| Age 70-79             | 234 (67.05%) | 894<br>(41.58%)  | 11.57 (6.68 - 20.04)  | 8.00 (4.49 - 14.25)  |
| Age 80+               | 46 (13.18%)  | 100 (4.65%)      | 20.34 (10.78 - 38.36) | 14.03 (7.18 - 27.44) |
| Sex                   | 221 (63.32%) | 1063<br>(49.44%) | 1.77 (1.40 - 2.23)    | 1.50 (1.16 - 1.94)   |
| Deprivation Q1        | 64 (18.34%)  | 389<br>(18.09%)  | 1                     | 1                    |
| Deprivation Q2        | 69 (19.77%)  | 427<br>(19.86%)  | 0.98 (0.68 - 1.42)    | 0.96 (0.65 - 1.41)   |
| Deprivation Q3        | 80 (22.92%)  | 567<br>(26.37%)  | 0.86 (0.60 - 1.22)    | 0.86 (0.59 - 1.25)   |
| Deprivation Q4        | 136 (38.97%) | 767<br>(35.67%)  | 1.08 (0.78 - 1.49)    | 1.11 (0.78 - 1.57)   |
| Ethnicity (non-white) | 35 (10.03%)  | 243<br>(11.30%)  | 0.87 (0.60 - 1.27)    | 1.40 (0.91 - 2.14)   |
| Obesity               | 67 (19.20%)  | 279<br>(12.98%)  | 1.59 (1.19 - 2.14)    | 1.24 (0.89 - 1.74)   |
| Smoking status        | 240 (68.77%) | 1326<br>(61.67%) | 1.37 (1.07 - 1.74)    | 1.10 (0.84 - 1.44)   |
| Organ transplant      | 3 (0.86%)    | 19 (0.88%)       | 0.97 (0.29 - 3.30)    | 0.60 (0.17 - 2.17)   |
| Cancer                | 97 (27.79%)  | 432<br>(20.09%)  | 1.53 (1.18 - 1.98)    | 1.13 (0.86 - 1.48)   |

|                                                       |              |                 |                    |                    |
|-------------------------------------------------------|--------------|-----------------|--------------------|--------------------|
| Severe respiratory disease                            | 69 (19.77%)  | 237<br>(11.02%) | 1.99 (1.48 - 2.67) | 1.03 (0.73 - 1.45) |
| Rare disease or inborn errors of metabolism           | 6 (1.72%)    | 18 (0.84%)      | 2.07 (0.82 - 5.26) | 1.89 (0.71 - 5.04) |
| Congenital heart defects                              | 4 (1.15%)    | 11 (0.51%)      | 2.25 (0.71 - 7.12) | 1.74 (0.49 - 6.09) |
| Cardiovascular disease                                | 206 (59.03%) | 761<br>(35.40%) | 2.63 (2.09 - 3.31) | 1.09 (0.81 - 1.46) |
| Chronic, non-severe respiratory disease               | 52 (14.90%)  | 302<br>(14.05%) | 1.07 (0.78 - 1.47) | 0.87 (0.61 - 1.24) |
| Chronic kidney disease                                | 59 (16.91%)  | 190 (8.84%)     | 2.10 (1.53 - 2.88) | 0.97 (0.68 - 1.40) |
| Cardiac disease                                       | 71 (20.34%)  | 211 (9.81%)     | 2.35 (1.74 - 3.16) | 1.21 (0.86 - 1.71) |
| Liver disease                                         | 42 (12.03%)  | 176 (8.19%)     | 1.53 (1.07 - 2.19) | 1.07 (0.73 - 1.59) |
| Chronic neurological conditions                       | 77 (22.06%)  | 215<br>(10.00%) | 2.55 (1.91 - 3.40) | 1.64 (1.20 - 2.24) |
| Diabetes                                              | 100 (28.65%) | 353<br>(16.42%) | 2.04 (1.58 - 2.65) | 1.21 (0.89 - 1.63) |
| Conditions or treatments that predispose to infection | 50 (14.33%)  | 157 (7.30%)     | 2.12 (1.51 - 2.98) | 1.52 (1.05 - 2.20) |
| Hypertension                                          | 238 (68.19%) | 942<br>(43.81%) | 2.75 (2.16 - 3.50) | 1.34 (1.00 - 1.81) |

**Table 2.** Performance of all prediction models under consideration

| Predictor Set | Results |               |
|---------------|---------|---------------|
|               | AUC-ROC | 95% CI        |
| Baseline      | 0.709   | 0.692 - 0.727 |
| EHCF - Model  | 0.734   | 0.704 - 0.764 |
| DCF - Model   | 0.730   | 0.700 -0.760  |

### Supplementary Material

**Supplementary Box 1.** Chapter number and description for each of the 22 chapter's making up the ICD-10 clinical codes

|                                                                                                          |
|----------------------------------------------------------------------------------------------------------|
| I: Certain infectious and parasitic diseases'                                                            |
| II: Neoplasms                                                                                            |
| III: Diseases of the blood and blood-forming organs and certain disorders involving the immune mechanism |
| IV: Endocrine, nutritional and metabolic diseases                                                        |
| V: Mental and behavioural disorders                                                                      |

VI: Diseases of the nervous system

VII: Diseases of the eye and adnexia

VIII: Diseases of the ear and mastoid process

IX: Diseases of the circulatory system

X: Diseases of the respiratory system

XI: K00-K95', 'Diseases of the digestive system'

XII: Diseases of the skin and subcutaneous tissue

XIII: Diseases of the musculoskeletal system and connective tissue

XIV: Diseases of the genitourinary system

XV: Pregnancy, childbirth and the puerperium

XVI: Certain conditions originating in the perinatal period

XVII: Congenital malformations, deformations and chromosomal abnormalities

XVIII: Symptoms, signs and abnormal clinical and laboratory findings, not elsewhere classified

XIX: Injury, poisoning and certain other consequences of external causes

XX: External causes of morbidity and mortality

XXI: Factors influencing health status and contact with health services

XXII: Codes for special purposes

**Supplementary Box 2.** Top 15 disease codes (in rank order) from all 30 topics of the 30-topic LDA model used in the DCF Model

**DCF 1:**

Rheumatoid arthritis  
Chemotherapy session for neoplasm  
Rheumatoid arthritis, unspecified (Site unspecified)  
Chronic lymphocytic leukaemia  
Diffuse non-Hodgkin's lymphoma - Large cell (diffuse)  
Personal history of malignant neoplasms of lymphoid, haematopoietic and related tissues  
Non-Hodgkin's lymphoma, unspecified type  
Rheumatoid arthritis, unspecified (Multiple sites)  
Polycythaemia vera  
Personal history of chemotherapy for neoplastic disease  
Follicular non-Hodgkin's lymphoma, unspecified

Agranulocytosis  
Thrombocytopenia  
Nonfamilial hypogammaglobulinaemia  
Prophylactic immunotherapy

**DCF 2:**

Personal history of allergy to penicillin  
Personal history of allergy to other drugs, medicaments and biological substances  
Personal history of allergy to analgesic agent  
Personal history of allergy to other antibiotic agents  
Personal history of allergy, other than to drugs and biological substances  
Hallux valgus (acquired)  
Special screening examination for diseases of the blood and blood-forming organs and certain disorders involving the immune mechanism  
Personal history of allergy to narcotic agent  
Arthrosis (Ankle and foot)  
Acquired deformities of fingers and toes - hammer toe(s) (acquired)  
Acquired deformities of fingers and toes - deformities of toe(s) (acquired)  
Hallux rigidus  
Personal history of allergy to sulphonamides  
Personal history of diseases of the genito-urinary system  
Lesion of plantar nerve

**DCF 3:**

Disorders of iron metabolism  
Multiple myeloma  
Bronchiectasis  
Acute myeloid leukaemia  
Transplanted organ and tissue status  
Personal history of infectious and parasitic diseases  
Personal history of chemotherapy for neoplastic disease  
Acquired absence of lung [part of]  
Personal history of malignant neoplasm of trachea, bronchus and lung  
Malignant neoplasm of bronchus and lung  
Malignant neoplasm of bronchus and lung - upper lobe, bronchus or lung  
Unspecified acute lower respiratory infection  
Abnormal findings on diagnostic imaging of lung  
Intrathoracic lymph nodes  
Personal history of diseases of the respiratory system

**DCF 4:**

Diaphragmatic hernia without obstruction or gangrene  
Gastro-oesophageal reflux disease without oesophagitis  
Gastritis, unspecified  
Gastro-oesophageal reflux disease with oesophagitis  
Iron deficiency anaemia, unspecified  
Oesophagitis  
Barrett's oesophagus  
Anaemia, unspecified  
Personal history of diseases of the digestive system  
Dyspepsia  
Polyp of stomach and duodenum  
Duodenitis  
Ulcer of oesophagus  
Other gastritis  
Dysphagia

**DCF 5:**

Personal history of psychoactive substance abuse



Mental and behavioural disorders due to use of tobacco - Harmful use  
Chronic obstructive pulmonary disease, unspecified  
Problems related to lifestyle - Tobacco use  
Problems related to lifestyle - Alcohol use  
Lobar pneumonia, unspecified  
Chronic obstructive pulmonary disease with acute lower respiratory infection  
Peripheral vascular disease, unspecified  
Emphysema, unspecified  
Pneumonia, unspecified  
Pleural effusion, not elsewhere classified  
Abdominal aortic aneurysm, without mention of rupture  
Unspecified acute lower respiratory infection  
Pulmonary collapse  
Chronic obstructive pulmonary disease with acute exacerbation, unspecified

**DCF 6:**

Malignant neoplasm of prostate  
Acquired absence of genital organ(s)  
Personal history of malignant neoplasm of genital organs  
Personal history of irradiation  
Malignant neoplasm of ovary  
Malignant neoplasm of corpus uteri - endometrium  
Family history of malignant neoplasm of genital organs  
Other specified abnormal findings of blood chemistry  
Fitting and adjustment of urinary device  
Personal history of chemotherapy for neoplastic disease  
Intrapelvic lymph nodes  
Myelodysplastic syndrome, unspecified  
Secondary malignant neoplasm of bone and bone marrow  
Naevus, nonneoplastic  
Other hypertrophic disorders of skin

**DCF 7:**

Chest pain, unspecified  
Radiotherapy session  
Calculus of ureter  
Internal haemorrhoids with other complications  
Benign lipomatous neoplasm of skin and subcutaneous tissue of trunk  
Dyspnoea  
Viral infection, unspecified  
Unspecified renal colic  
Benign lipomatous neoplasm of skin and subcutaneous tissue of limbs  
Observation for suspected myocardial infarction  
Lymphoedema, not elsewhere classified  
Bilateral inguinal hernia, without obstruction or gangrene  
R07 Pain in throat and chest - R07.2 Precordial pain  
R04 Haemorrhage from respiratory passages - R04.0 Epistaxis  
Cardiac murmur, unspecified

**DCF 8:**

Personal history of long-term (current) use of anticoagulants  
Atrial fibrillation and flutter  
Personal history of diseases of the circulatory system  
Atrial fibrillation and atrial flutter, unspecified  
Presence of cardiac pacemaker  
Congestive heart failure  
Paroxysmal atrial fibrillation  
Pulmonary embolism without mention of acute cor pulmonale  
Aortic (valve) stenosis

Left ventricular failure  
Cardiomegaly  
Mitral (valve) insufficiency  
Supraventricular tachycardia  
Phlebitis and thrombophlebitis of other deep vessels of lower extremities  
Left bundle-branch block, unspecified

**DCF 9:**

Malignant neoplasm of breast  
Chemotherapy session for neoplasm  
Personal history of malignant neoplasm of breast  
Axillary and upper limb lymph nodes  
Acquired absence of breast(s)  
Malignant neoplasm of breast - upper-outer quadrant of breast  
Secondary malignant neoplasm of bone and bone marrow  
Family history of malignant neoplasm of breast  
Personal history of irradiation  
Personal history of chemotherapy for neoplastic disease  
Follow-up care involving plastic surgery of breast  
Lymph nodes of head, face and neck  
Malignant neoplasm of breast - upper-inner quadrant of breast  
Secondary malignant neoplasm of lung  
Carcinoma in situ of breast - intraductal carcinoma in situ

**DCF 10:**

Presence of orthopaedic joint implants  
Gonarthrosis, unspecified  
Coxarthrosis, unspecified  
Arthrosis, unspecified  
Obesity, unspecified  
Polyarthrosis, unspecified  
Surgical operation with implant of artificial internal device  
Arthritis, unspecified  
Other primary gonarthrosis  
Arthrosis, unspecified (Site unspecified)  
Derangement of meniscus due to old tear or injury  
Carpal tunnel syndrome  
Other primary coxarthrosis  
Mechanical complication of internal joint prosthesis  
Derangement of meniscus due to old tear or injury

**DCF 11:**

Hypothyroidism, unspecified  
Multiple sclerosis  
Dental caries, unspecified  
Postprocedural hypothyroidism  
Thyrotoxicosis, unspecified  
Retained dental root  
Special screening examination for other specified diseases and disorders  
Hypopituitarism  
Thyrotoxicosis with diffuse goitre  
Vitamin B12 deficiency anaemia due to intrinsic factor deficiency  
Benign neoplasm of other and unspecified endocrine glands - pituitary gland  
Benign neoplasm of breast  
Malignant neoplasm of thyroid gland  
Primary adrenocortical insufficiency  
Other benign neoplasms of skin - skin of eyelid, including canthus

**DCF 12:**

Low back pain  
Nerve root and plexus compressions in intervertebral disk disorders  
Spinal stenosis (Lumbar region)  
Lumbar and other intervertebral disk disorders with radiculopathy  
Other chemotherapy  
Other specified intervertebral disk degeneration  
Other spondylosis (Cervical region)  
Dorsalgia, unspecified  
Other specified intervertebral disk displacement  
Palmar fascial fibromatosis [Dupuytren]  
Low back pain (Lumbar region)  
Other spondylosis (Lumbar region)  
Personal history of diseases of the musculoskeletal system and connective tissue  
Sciatica  
Cervicalgia

**DCF 13:**

Personal history of malignant neoplasm of urinary tract  
Excessive and frequent menstruation with regular cycle  
Leiomyoma of uterus, unspecified  
Postmenopausal bleeding  
Malignant neoplasm of bladder  
Calculus of kidney  
Polyp of corpus uteri  
Personal history of diseases of the genito-urinary system  
Follow-up examination after surgery for malignant neoplasm  
Other and unspecified ovarian cysts  
Acquired absence of kidney  
Polyp of cervix uteri  
Incomplete uterovaginal prolapse  
pelvic peritoneal adhesions  
Excessive and frequent menstruation with irregular cycle

**DCF 14:**

Other chemotherapy  
Raynaud's syndrome  
Other interstitial pulmonary diseases with fibrosis  
Sicca syndrome [Sjogren]  
Polyneuropathy, unspecified  
Systemic lupus erythematosus, unspecified  
Interstitial cystitis (chronic)  
Melanocytic naevi of other and unspecified parts of face  
Sarcoidosis, unspecified  
Ankylosing spondylitis  
Other inflammatory polyneuropathies  
Other disorders of arteries  
Other specified polyneuropathies  
Other chronic pain  
Wegener's granulomatosis

**DCF 15:**

Other and unspecified abdominal pain  
Nausea and vomiting  
Headache  
Non-infective gastro-enteritis and colitis, unspecified  
Change in bowel habit  
Constipation  
Other chest pain  
Pain localised to other parts of lower abdomen

Syncope and collapse  
Migraine, unspecified  
Dizziness and giddiness  
Abnormal weight loss  
Pain localised to upper abdomen  
Hearing loss, unspecified  
Gastro-oesophageal reflux disease without oesophagitis

**DCF 16:**

Hyperplasia of prostate  
Unilateral or unspecified inguinal hernia, without obstruction or gangrene  
Personal history of malignant neoplasms of other organs and systems  
Unspecified haematuria  
Other malignant neoplasms of skin and unspecified parts of face  
Other specified disorders of bladder  
Retention of urine  
Urethral stricture, unspecified  
Personal history of diseases of the genito-urinary system  
Disorder of skin and subcutaneous tissue, unspecified  
Trichilemmal cyst  
Polyuria  
Urinary tract infection, site not specified  
Seborrhoeic keratosis  
Other and unspecified symptoms and signs involving the urinary system

**DCF 17:**

Personal history of malignant neoplasm of digestive organs  
Acquired absence of other parts of digestive tract  
Chemotherapy session for neoplasm  
Malignant neoplasm of rectum  
Intestinal bypass and anastomosis status  
Intra-abdominal lymph nodes  
Malignant neoplasm of colon - sigmoid colon  
Ileostomy status  
Secondary malignant neoplasm of liver  
0 Follow-up examination after surgery for malignant neoplasm  
5 Arthropathic psoriasis  
Personal history of chemotherapy for neoplastic disease  
Colostomy status  
Malignant neoplasm of colon - colon  
Malignant neoplasm of colon - caecum

**DCF 18:**

Personal history of diseases of the circulatory system  
Urinary tract infection, site not specified  
Personal history of diseases of the nervous system and sense organs  
Acute renal failure, unspecified  
Tendency to fall, not elsewhere classified  
Physical therapy  
Parkinson's disease  
Hypo-osmolality and hyponatraemia  
Other and unspecified abnormalities of gait and mobility  
Constipation  
Occupational therapy and vocational rehabilitation, not elsewhere classified  
Escherichia coli [E. coli] as the cause of diseases  
Hemiplegia, unspecified  
Volume depletion  
Disorientation, unspecified

**DCF 19:**

110 Essential (primary) hypertension  
hypercholesterolaemia  
Personal history of long-term (current) use of other medicaments  
3 Chronic kidney disease, stage 3  
Gout, unspecified  
Obesity, unspecified  
Personal history of diseases of the nervous system and sense organs  
Hyperlipidaemia, unspecified  
Gout, unspecified (Site unspecified)  
Other specified abnormal findings of blood chemistry  
Arthrosis, unspecified  
Arthritis, unspecified  
Gastro-oesophageal reflux disease without oesophagitis  
Procedure not carried out because of contraindication  
Personal history of psychoactive substance abuse

**DCF 20:**

Diverticular disease of large intestine without perforation or abscess  
Polyp of colon  
Diverticular disease of intestine, part unspecified, without perforation or abscess  
Family history of malignant neoplasm of digestive organs  
Unspecified haemorrhoids without complication  
Personal history of diseases of the digestive system  
Special screening examination for neoplasm of intestinal tract  
Haemorrhage of anus and rectum  
Personal history of other neoplasms  
Rectal polyp  
Sigmoid colon  
Gastro-intestinal haemorrhage, unspecified  
Follow-up examination after surgery for other conditions  
Haemorrhoids, unspecified  
Change in bowel habit

**DCF 21:**

Cataract, unspecified  
Senile nuclear cataract  
Presence of intraocular lens  
Glaucoma  
Degeneration of macula and posterior pole  
Psoriasis, unspecified  
Sterilisation  
Senile cataract  
Senile incipient cataract  
6 Personal history of diseases of the nervous system and sense organs  
Primary open-angle glaucoma  
Myopia  
Family history of eye and ear disorders  
After-cataract  
Arthritis, unspecified

**DCF 22:**

Depressive episode  
Anxiety disorder  
Mental and behavioural disorders due to use of alcohol - harmful use  
Cellulitis of other parts of limb  
Mental and behavioural disorders due to use of alcohol - dependence syndrome  
Bipolar affective disorder, unspecified  
Mixed anxiety and depressive disorder

Personal history of self-harm  
Unknown and unspecified causes of morbidity  
Poisoning by nonopioid analgesics, antipyretics and antirheumatics: 4-Aminophenol derivatives  
Mental and behavioural disorders due to use of tobacco - harmful use  
Personal history of other mental and behavioural disorders  
Mental and behavioural disorders due to use of alcohol - withdrawal state  
Schizophrenia  
Mental and behavioural disorders due to use of alcohol - acute intoxication

**DCF 23:**

Non-insulin-dependent diabetes mellitus  
apnoea  
Insulin-dependent diabetes mellitus  
Obesity, unspecified  
Diabetic retinopathy  
Unspecified diabetes mellitus  
Ophthalmic complications of non-insulin-dependent diabetes mellitus  
Ulcer of lower limb  
Other obesity  
Cellulitis of other parts of limb  
Acute renal failure  
Hypoglycaemia  
Chronic renal failure  
9 Iron deficiency anaemia, unspecified  
Neurological complications of non-insulin-dependent diabetes mellitus

**DCF 24:**

Extracorporeal dialysis  
Chronic kidney disease, stage 5  
Chronic renal failure, unspecified  
End-stage renal disease  
Polymyalgia rheumatica  
Kidney transplant status  
Dependence on renal dialysis  
Hypertensive renal disease with renal failure  
Other and unspecified cirrhosis of liver  
Chronic kidney disease, stage 4  
Portal hypertension  
Alcoholic cirrhosis of liver  
Unspecified renal failure  
Oesophageal varices without bleeding  
Ascites

**DCF 25:**

Angina pectoris  
Atherosclerotic heart disease  
Chronic IHD  
Old myocardial infarction  
Presence of coronary angioplasty implant and graft  
Personal history of long-term use of other medicaments  
Pure hypercholesterolaemia  
Presence of aortocoronary bypass graft  
Family history of IHD  
Other forms of chronic ischaemic heart disease  
Personal history of psychoactive substance abuse  
Chest pain  
Essential (primary) hypertension  
Unstable angina  
Hyperlipidaemia, unspecified

**DCF 26:**

Osteoporosis, unspecified  
Epilepsy, unspecified  
Irritable bowel syndrome without diarrhoea  
Crohn's disease, unspecified  
Osteoporosis, unspecified (Site unspecified)  
Coeliac disease  
Fracture of lower end of radius (closed)  
Vitamin D deficiency, unspecified  
Other specified disorders of bone density and structure  
Arthrosis, unspecified  
Deficiency of other specified B group vitamins  
Fracture of neck of femur (closed)  
Crohn's disease of large intestine  
Crohn's disease of small intestine  
Primary hyperparathyroidism

**DCF 27:**

Carpal tunnel syndrome  
Fibromyalgia  
Exposure to unspecified factor - unspecified place  
Follow-up care involving removal of fracture plate and other internal fixation device  
Unspecified fall  
Fractures of other parts of lower leg (closed)  
wound of finger(s) without damage to nail  
Unspecified injury of head  
Fall on and from stairs and steps at home  
Fall on same level from slipping, tripping and stumbling at home  
Fracture of upper end of humerus (closed)  
Postviral fatigue syndrome  
Open wound of other parts of head  
Fall on same level from slipping, tripping and stumbling, unspecified place  
Multiple fractures of ribs (closed)

**DCF 28:**

Personal history of diseases of the digestive system  
Calculus of gallbladder without cholecystitis  
Acquired absence of other parts of digestive tract  
Calculus of gallbladder with other cholecystitis  
following a procedure, not elsewhere classified  
Removal of other organ (partial) (total)  
Pain localised to upper abdomen  
Abnormal results of liver function studies  
Other surgical procedures  
Peritoneal adhesions  
Fatty (change of) liver, not elsewhere classified  
Unspecified abdominal pain  
Haemorrhage and haematoma complicating a procedure, not elsewhere classified  
Calculus of bile duct without cholangitis or cholecystitis  
Ventral hernia without obstruction or gangrene

**DCF 29:**

Single live birth  
Varicose veins of lower extremities without ulcer or inflammation  
Ulcerative colitis, unspecified  
degree perineal laceration during delivery  
First degree perineal laceration during delivery

Other disorders of synovium and tendon: ganglion  
Other specified pregnancy-related conditions  
Spontaneous vertex delivery  
Labour and delivery complicated by foetal heart rate anomaly  
Missed abortion  
Maternal care for other specified foetal problems  
Prolonged second stage (of labour)  
Maternal care due to uterine scar from previous surgery  
Prolonged pregnancy  
Other and unspecified abdominal pain

**DCF 30:**

Asthma, unspecified  
Unknown and unspecified causes of morbidity  
Stress incontinence  
Female genital prolapse: cystocele  
Impingement syndrome of shoulder  
Female genital prolapse: rectocele  
Rotator cuff syndrome  
Dermatitis, unspecified  
Arthrosis, unspecified (Shoulder region)  
Unspecified acute lower respiratory infection  
Predominantly allergic asthma  
Adhesive capsulitis of shoulder  
Obesity  
Gastro-oesophageal reflux disease without oesophagitis  
Other shoulder lesions
